# Supplementary material for: Laser-induced fragmentation of coronene cations
Source: Royal Society of Chemistry journal article supplement (doi:10.1039/d4cp01301h), 2024-01-01
Supplement: d4cp01301h1.pdf [file d4cp01301h1.pdf]

## Electronic Supplementary Information to Laser-induced fragmentation of coronene cations

**Sanjana Panchagnula**,<sup>\*,1,2,3</sup> Jerry Kamer,<sup>1</sup> Alessandra Candian,<sup>4</sup> Helgi R. Hrodmarsson,<sup>1,5</sup>  
Harold Linnartz,<sup>1</sup> **Jordy Bouwman**,<sup>\*,1,6,7,8</sup> and Alexander G.G.M. Tielens<sup>2,9</sup>

<sup>1</sup>*Laboratory for Astrophysics, Leiden Observatory, Leiden University, 2300 RA, Leiden, The Netherlands.*

<sup>2</sup>*Leiden Observatory, University of Leiden, 2300 RA, Leiden, The Netherlands.*

<sup>3</sup>*Current address: St George's, University of London, Cranmer Terrace, London, SW17 0RE, United Kingdom.*

<sup>4</sup>*Anton Pannekoek Institute for Astronomy, University of Amsterdam, Science Park 904, 1098 XH, Amsterdam, Netherlands.*

<sup>5</sup>*Univ Paris Est Créteil and Université Paris Cité, CNRS, LISA UMR 7583, F-94010, Créteil, France.*

<sup>6</sup>*Current address: Laboratory for Atmospheric and Space Physics, University of Colorado, CO 80303, Boulder United States of America.*

<sup>7</sup>*Current address: Department of Chemistry, University of Colorado, CO 80309, Boulder, United States of America.*

<sup>8</sup>*Current address: Institute for Modeling Plasma, Atmospheres and Cosmic Dust (IMPACT), NASA/SSERVI, CO 80309, Boulder, United States of America.*

<sup>9</sup>*Department of Astronomy, University of Maryland, College Park, MD 20742-2421, United States of America.*

E-mail: spanchag@sgul.ac.uk; jordy.bouwman@colorado.edu

This Electronic Supplementary Information contains further information to the main manuscript. Here, we present the full time-of-flight (TOF) mass spectra following the dissociation of coronene cations after irradiation with 630 nm laser light at 2.4 mJ/pulse. The RF voltage was tuned to 1300 V, leading to a low-mass cut off of  $m/z = 80$ .

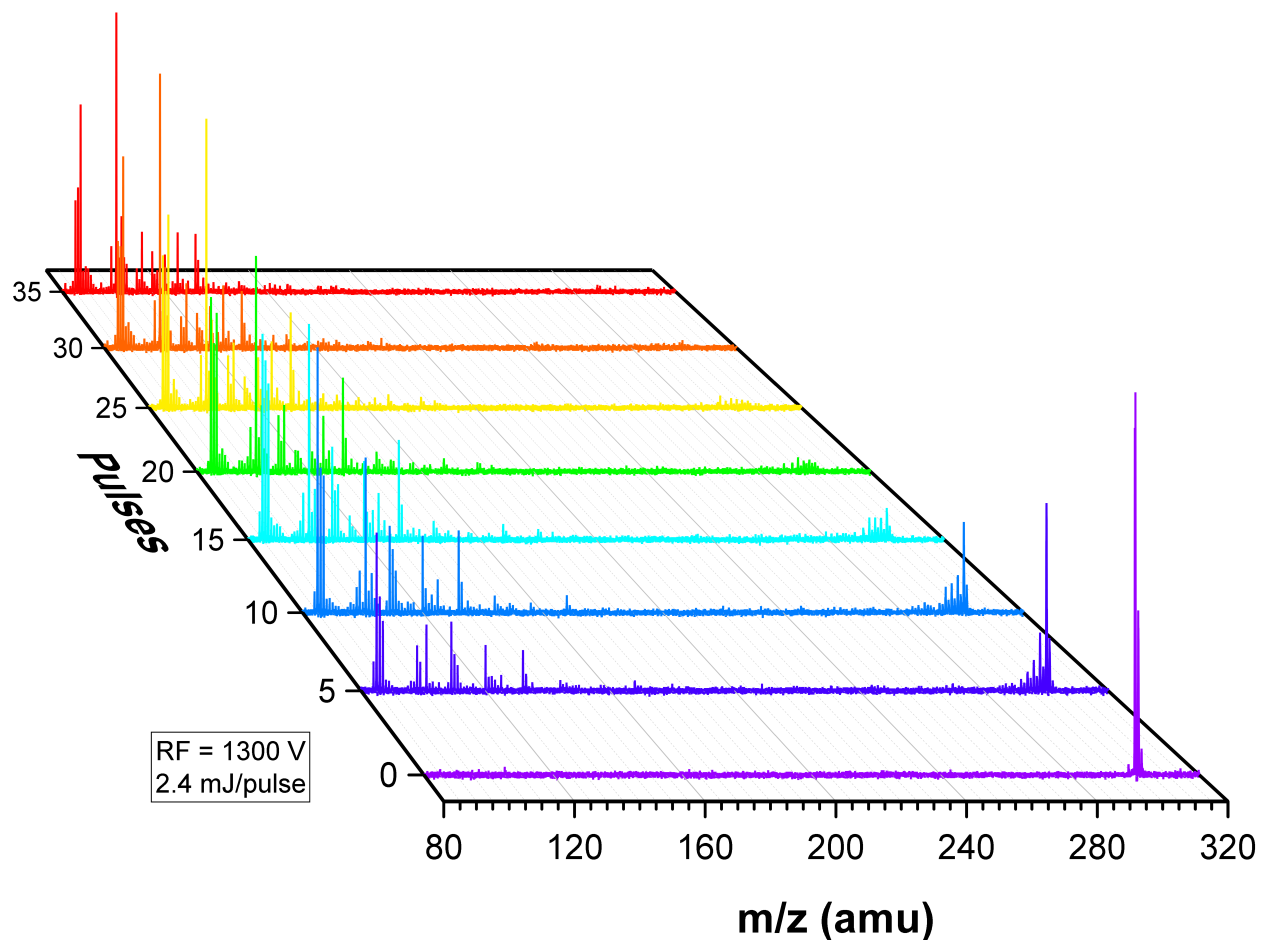

Figure S1: TOF mass spectra of coronene radical cations irradiated at 2.4 mJ/pulse, in the  $m/z = 320$ -80 range. The RF pulse was tuned to 1300 V in order to facilitate the capture of low mass dissociation fragments.

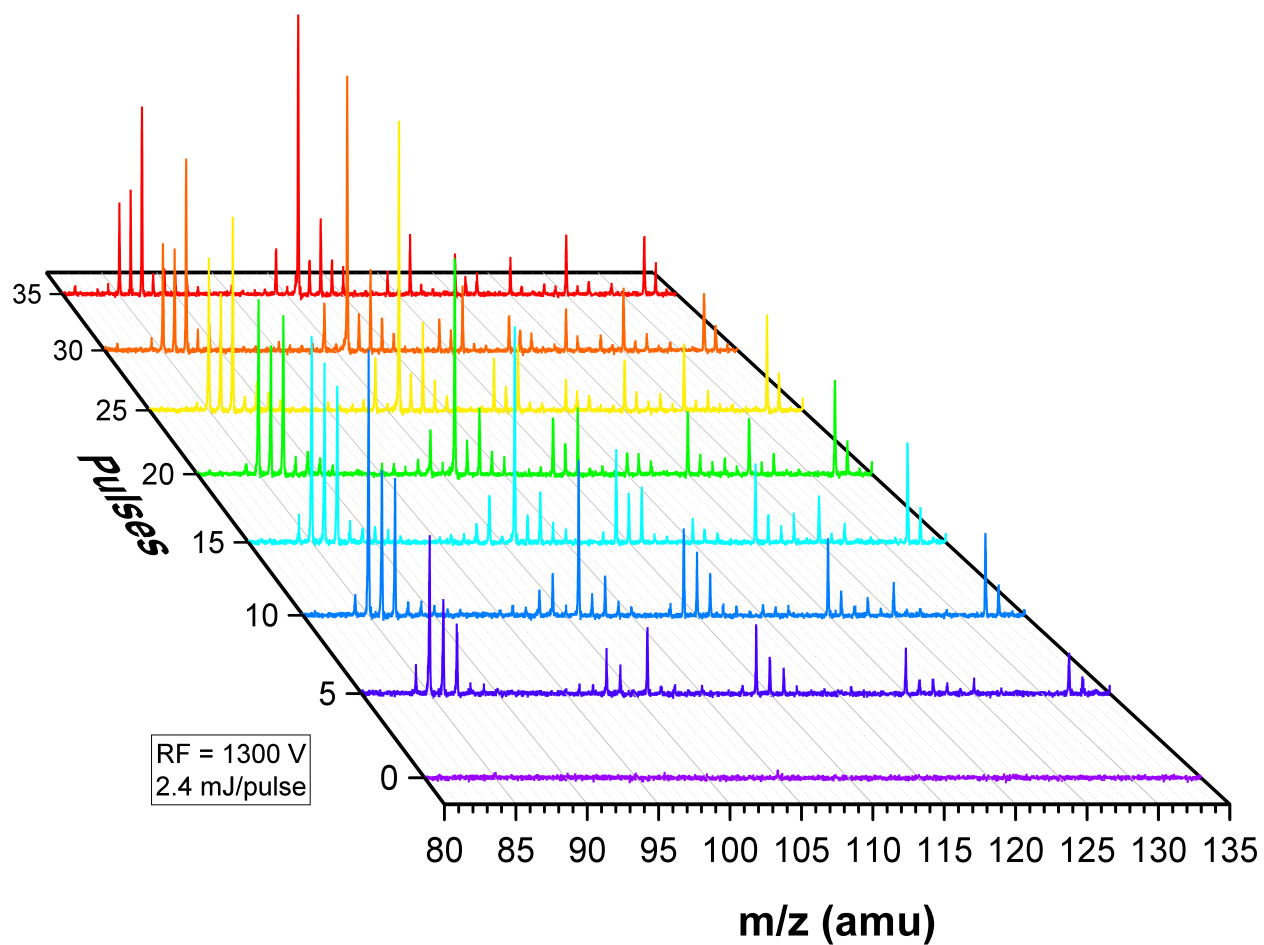

Figure S2: TOF mass spectra of coronene radical cations irradiated at 2.4 mJ/pulse, in the  $m/z = 320$ -80 range. The RF pulse was tuned to 1300 V in order to facilitate the capture of low mass dissociation fragments. This figure is a zoom-in of Fig.S1.
